# Supplementary material
Source: publisher figshare collection journal article supplement (https://geolsoc.figshare.com/articles/dataset/_/3452828)
Supplement: Supplementary file 2 [file 1]

| Site (WM) | K1 <sub>norm</sub> | dec   | dip   | K2 <sub>norm</sub> | dec   | dip   | K3 <sub>norm</sub> | dec   | dip   | L   | F   | M   | Mu | H    | L    | F    | P    | T     | Shape            | lat        | lon        | Susceptibility | K <sub>mean</sub> | notes                                  |
|-----------|--------------------|-------|-------|--------------------|-------|-------|--------------------|-------|-------|-----|-----|-----|----|------|------|------|------|-------|------------------|------------|------------|----------------|-------------------|----------------------------------------|
| 1         | 1.014              | 317.6 | -12.5 | 1.007              | 253.5 | 23.5  | 0.979              | 253.5 | 63.0  | 1%  | 3%  | 0.3 | 14 | 4%   | 1.01 | 1.03 | 1.04 | 0.61  | oblate           | 54.183437° | -6.065064° | 648.5          | 6.485E-04         | L = [(K1-K2)/Kmean]*100                |
| 2         | 1.009              | 271.2 | -6.4  | 1.008              | 359.2 | 17.0  | 0.984              | 201.1 | 71.7  | 0%  | 2%  | 0.0 | 2  | 2%   | 1.00 | 1.02 | 1.03 | 0.92  | oblate           | 54.183245° | -6.067452° | 1509.58        | 1.510E-03         | F = [(K2-K3)/Kmean]*100                |
| 3         | 1.012              | 321.2 | 6.4   | 1.002              | 53.6  | 20.5  | 0.985              | 214.7 | 68.4  | 1%  | 2%  | 0.6 | 30 | 3%   | 1.01 | 1.02 | 1.03 | 0.27  | oblate-triaxial  | 54.184430° | -6.069535° | 2035.64        | 2.036E-03         | M                                      |
| 4         | 1.011              | 249.4 | 36.9  | 1.003              | 325.6 | -17.6 | 0.986              | 35.1  | 47.8  | 1%  | 2%  | 0.5 | 25 | 2%   | 1.01 | 1.02 | 1.03 | 0.37  | oblate-triaxial  | 54.141615° | -6.062120° | 2194.29        | 2.194E-03         | Mu = tan <sup>-1</sup> M               |
| 5         | 1.011              | 129.9 | -13.4 | 1.004              | 196.3 | 59.2  | 0.985              | 46.9  | 27.2  | 1%  | 2%  | 0.4 | 20 | 3%   | 1.01 | 1.02 | 1.03 | 0.47  | oblate-triaxial  | 54.139573° | -6.063938° | 2413.3         | 2.413E-03         | H = [(K1-K3)/Kmean]*100                |
| 6         | 1.009              | 241.7 | -13.3 | 1                  | 342.5 | -38.5 | 0.991              | 316.1 | 48.4  | 1%  | 1%  | 1.0 | 45 | 2%   | 1.01 | 1.01 | 1.02 | 0.00  | triaxial         | 54.139651° | -6.066799° | 2350.54        | 2.351E-03         | L = K1/K2                              |
| 7         | 1.011              | 243.0 | -10.2 | 1.002              | 335.0 | -11.3 | 0.987              | 291.9 | 74.7  | 1%  | 2%  | 0.6 | 31 | 2%   | 1.01 | 1.02 | 1.02 | 0.26  | oblate-triaxial  | 54.128285° | -6.061790° | 300.31         | 3.003E-04         | F = K2/K3                              |
| 8         | 1.007              | 3.6   | 31.2  | 1.004              | 96.1  | 4.0   | 0.989              | 192.6 | 58.5  | 0%  | 2%  | 0.2 | 11 | 2%   | 1.00 | 1.02 | 1.02 | 0.67  | oblate           | 54.157868° | -6.117925° | 4225.82        | 4.226E-03         | P = K1/K3                              |
| 9         | 1.011              | 324.6 | 27.2  | 1.008              | 53.6  | -1.9  | 0.981              | 139.9 | 62.7  | 0%  | 3%  | 0.1 | 6  | 3%   | 1.00 | 1.03 | 1.03 | 0.80  | oblate           | 54.157560° | -6.118711° | 2941.62        | 2.942E-03         | T = (ln F - ln L) / (ln F + ln L)      |
| 10        | 1.078              | 335.4 | -60.0 | 0.999              | 103.5 | -19.6 | 0.923              | 21.6  | 21.8  | 8%  | 8%  | 1.0 | 46 | 16%  | 1.08 | 1.08 | 1.17 | 0.02  | triaxial         | 54.155087° | -6.118282° | 2078.7         | 2.079E-03         | Kmean reported in 10 <sup>6</sup> (SI) |
| 11        | 1.011              | 331.9 | 12.1  | 1.004              | 68.2  | 27.0  | 0.984              | 220.1 | 60.0  | 1%  | 2%  | 0.3 | 19 | 3%   | 1.01 | 1.02 | 1.03 | 0.49  | oblate           | 54.151909° | -6.118547° | 5797.37        | 5.797E-03         | G4A                                    |
| 12        | 1.008              | 19.6  | 16.1  | 1.002              | 111.9 | 7.7   | 0.99               | 226.6 | 72.1  | 1%  | 1%  | 0.5 | 27 | 2%   | 1.01 | 1.01 | 1.02 | 0.34  | oblate-triaxial  | "          | "          | 4473.76        | 4.474E-03         | G4B                                    |
| 13        | 1.006              | 27.6  | 19.0  | 1.002              | 122.2 | 13.0  | 0.992              | 244.6 | 66.7  | 0%  | 1%  | 0.4 | 22 | 1%   | 1.00 | 1.01 | 1.01 | 0.43  | oblate-triaxial  | 54.149550° | -6.111407° | 1936           | 1.936E-03         | G5A                                    |
| 14        | 1.003              | 301.8 | -25.7 | 1.003              | 21.6  | 20.1  | 0.994              | 258.3 | 56.4  | 0%  | 1%  | 0.0 | 0  | 1%   | 1.00 | 1.01 | 1.01 | 1.00  | oblate           | 54.147842° | -6.092672° | 1658.81        | 1.659E-03         | G5B                                    |
| 15        | 1.015              | 31.1  | 17.9  | 1.007              | 137.1 | 40.4  | 0.978              | 282.9 | 44.1  | 1%  | 3%  | 0.3 | 15 | 4%   | 1.01 | 1.03 | 1.04 | 0.57  | oblate           | 54.149065° | -6.089723° | 4024.22        | 4.024E-03         |                                        |
| 16        | 1.008              | 32.7  | 37.9  | 1.006              | 118.3 | -5.6  | 0.986              | 201.1 | 51.5  | 0%  | 2%  | 0.1 | 6  | 2%   | 1.00 | 1.02 | 1.02 | 0.82  | oblate           | 54.156006° | -6.094775° | 3078.35        | 3.078E-03         |                                        |
| 17        | 1.005              | 69.1  | 13.0  | 1.001              | 220.0 | 75.2  | 0.995              | 337.5 | 6.9   | 0%  | 1%  | 0.7 | 34 | 1%   | 1.00 | 1.01 | 1.01 | 0.20  | oblate-triaxial  | 54.157654° | -6.108884° | 1420.53        | 1.421E-03         |                                        |
| 18        | 1.536              | 152.4 | 54.8  | 0.965              | 316.4 | 34.1  | 0.499              | 51.5  | 7.6   | 57% | 47% | 1.2 | 51 | 104% | 1.59 | 1.93 | 3.08 | 0.17  | triaxial         | 54.161683° | -6.114160° | 4463.19        | 4.463E-03         |                                        |
| 19        | 1.011              | 334.5 | 6.3   | 1.006              | 64.5  | 0.2   | 0.983              | 156.1 | 83.7  | 0%  | 2%  | 0.2 | 12 | 3%   | 1.00 | 1.02 | 1.03 | 0.65  | oblate           | 54.166285° | -6.110758° | 1548.1         | 1.548E-03         |                                        |
| 20        | 1.003              | 207.1 | -78.9 | 1.002              | 49.7  | -10.3 | 0.995              | 318.9 | -4.2  | 0%  | 1%  | 0.1 | 8  | 1%   | 1.00 | 1.01 | 1.01 | 0.75  | oblate           | 54.166602° | -6.112721° | 2019           | 2.019E-03         |                                        |
| 21        | 1.013              | 9.1   | 16.0  | 1.006              | 98.7  | -1.2  | 0.981              | 184.5 | 73.9  | 1%  | 3%  | 0.3 | 16 | 3%   | 1.01 | 1.03 | 1.03 | 0.57  | oblate           | 54.166946° | -6.111967° | 1655.34        | 1.655E-03         |                                        |
| 22        | 1.005              | 342.9 | 16.9  | 1.004              | 68.4  | -14.6 | 0.991              | 119.7 | 67.4  | 0%  | 1%  | 0.1 | 4  | 1%   | 1.00 | 1.01 | 1.01 | 0.86  | oblate           | 54.179069° | -6.099970° | 435.66         | 4.357E-04         |                                        |
| 23        | 1.005              | 20.2  | -13.9 | 1                  | 105.8 | 17.6  | 0.995              | 326.5 | 67.3  | 0%  | 1%  | 1.0 | 45 | 1%   | 1.01 | 1.01 | 1.01 | 0.00  | triaxial         | 54.174736° | -6.097288° | 2492.02        | 2.492E-03         |                                        |
| 24        | 1.008              | 258.3 | 31.1  | 1.001              | 6.7   | 27.7  | 0.99               | 129.6 | 46.0  | 1%  | 1%  | 0.6 | 32 | 2%   | 1.01 | 1.01 | 1.02 | 0.23  | oblate-triaxial  | 54.180655° | -6.091754° | 3508.17        | 3.508E-03         |                                        |
| 25        | 1.01               | 235.2 | 4.2   | 1.001              | 326.6 | 18.5  | 0.989              | 132.8 | 71.0  | 1%  | 1%  | 0.8 | 37 | 2%   | 1.01 | 1.01 | 1.02 | 0.15  | triaxial         | 54.181849° | -6.092973° | 2259           | 2.259E-03         |                                        |
| 26        | 1.008              | 275.9 | 73.2  | 0.999              | 24.7  | 5.6   | 0.992              | 116.3 | 15.8  | 1%  | 1%  | 1.3 | 52 | 2%   | 1.01 | 1.01 | 1.02 | -0.12 | triaxial         | 54.182421° | -6.093783° | 2000.81        | 2.001E-03         |                                        |
| 27        | 1.005              | 263.8 | 30.9  | 1                  | 17.1  | 33.5  | 0.995              | 142.4 | 41.1  | 0%  | 1%  | 1.0 | 45 | 1%   | 1.01 | 1.01 | 1.01 | 0.00  | triaxial         | 54.181236° | -6.094450° | 1629.99        | 1.630E-03         |                                        |
| 29A       | 1.014              | 237.9 | -6.2  | 1.001              | 330.1 | -19.1 | 0.986              | 310.6 | 69.8  | 1%  | 1%  | 0.9 | 41 | 3%   | 1.01 | 1.02 | 1.03 | 0.08  | triaxial         | 54.179865° | -6.063079° | 1901.94        | 1.902E-03         |                                        |
| 29B       | 1.004              | 233.3 | -7.8  | 1.001              | 325.3 | -14.6 | 0.995              | 296.0 | 73.4  | 0%  | 1%  | 0.5 | 27 | 1%   | 1.00 | 1.01 | 1.01 | 0.34  | oblate-triaxial  | "          | "          | 2493           | 2.493E-03         |                                        |
| 30        | 1.006              | 280.3 | -4.7  | 1.003              | 9.1   | 14.3  | 0.991              | 208.1 | 74.9  | 0%  | 1%  | 0.3 | 14 | 2%   | 1.00 | 1.01 | 1.02 | 0.60  | oblate           | 54.176299° | -6.078432° | 52.79          | 5.279E-05         |                                        |
| 31        | 1.009              | 67.3  | 41.3  | 0.998              | 287.8 | 40.8  | 0.993              | 357.8 | -21.7 | 1%  | 1%  | 2.2 | 66 | 2%   | 1.01 | 1.01 | 1.02 | -0.37 | prolate-triaxial | 54.175918° | -6.079325° | 525.84         | 5.258E-04         |                                        |
| 32        | 1.004              | 319.5 | 4.1   | 1.002              | 50.4  | 12.3  | 0.994              | 211.4 | 77.0  | 0%  | 1%  | 0.3 | 14 | 1%   | 1.00 | 1.01 | 1.01 | 0.60  | oblate           | 54.173488° | -6.082411° | 216.28         | 2.163E-04         |                                        |
| 33        | 1.006              | 312.5 | -2.6  | 1.005              | 41.8  | 14.0  | 0.989              | 232.9 | 75.7  | 0%  | 2%  | 0.1 | 4  | 2%   | 1.00 | 1.02 | 1.02 | 0.88  | oblate           | 54.134340° | -6.074027° | 4513.74        | 4.514E-03         |                                        |
| 34        | 1.008              | 7.7   | -8.2  | 1.002              | 97.5  | 1.5   | 0.991              | 356.9 | 81.7  | 1%  | 1%  | 0.5 | 29 | 2%   | 1.01 | 1.01 | 1.02 | 0.30  | oblate-triaxial  | 54.134775° | -6.074373° | 3888.24        | 3.888E-03         |                                        |
| 35A       | 1.027              | 24.3  | 21.1  | 1.009              | 116.7 | 6.4   | 0.964              | 222.6 | 67.8  | 2%  | 4%  | 0.4 | 22 | 6%   | 1.02 | 1.05 | 1.07 | 0.44  | oblate-triaxial  | 54.141240° | -6.079416° | 4890.47        | 4.890E-03         |                                        |
| 35B       | 1.008              | 15.9  | 14.0  | 0.999              | 105.7 | -0.8  | 0.993              | 192.6 | 76.0  | 1%  | 1%  | 1.5 | 56 | 2%   | 1.01 | 1.01 | 1.02 | -0.20 | prolate-triaxial | "          | "          | 3150.89        | 3.151E-03         |                                        |
| 36        | 1.018              | 268.7 | -33.5 | 1                  | 354.6 | 6.3   | 0.982              | 255.2 | 55.8  | 2%  | 2%  | 1.0 | 45 | 4%   | 1.02 | 1.02 | 1.04 | 0.01  | triaxial         | 54.144583° | -6.081389° | 2446.72        | 2.447E-03         |                                        |
| 37        | 1.018              | 269.4 | -11.0 | 1.011              | 358.0 | 7.2   | 0.97               | 235.2 | 76.8  | 1%  | 4%  | 0.2 | 10 | 5%   | 1.01 | 1.04 | 1.05 | 0.71  | oblate           | 54.145138° | -6.081941° | 5518.07        | 5.518E-03         |                                        |
| 38        | 1.016              | 233.9 | -22.4 | 1.006              | 334.8 | -24.7 | 0.978              | 286.9 | 55.5  | 1%  | 3%  | 0.4 | 20 | 4%   | 1.01 | 1.03 | 1.04 | 0.48  | oblate           | 54.144299° | -6.091417° | 2699.08        | 2.699E-03         |                                        |
| 39        | 1.01               | 332.7 | -0.5  | 1.004              | 62.3  | 36.5  | 0.987              | 243.5 | 53.5  | 1%  | 2%  | 0.4 | 19 | 2%   | 1.01 | 1.02 | 1.02 | 0.48  | oblate           | 54.143776° | -6.090974° | 1795.44        | 1.795E-03         |                                        |
| 40        | 1.006              | 357.5 | -10.0 | 1.004              | 81.3  | 31.6  | 0.99               | 283.0 | 56.5  | 0%  | 1%  | 0.1 | 8  | 2%   | 1.00 | 1.01 | 1.02 | 0.75  | oblate           | 54.143096° | -6.090692° | 3923.09        | 3.923E-03         |                                        |
| 41        | 1.007              | 8.0   | -2.5  | 1.002              | 96.6  | 29.4  | 0.991              | 282.4 | 60.4  | 0%  | 1%  | 0.5 | 24 | 2%   | 1.00 | 1.01 | 1.02 | 0.38  | oblate-triaxial  | 54.140219° | -6.089846° | 4784.61        | 4.785E-03         |                                        |
| 41A       | 1.007              | 179.4 | 10.7  | 0.999              | 73.2  | 55.9  | 0.994              | 96.1  | -32.0 | 1%  | 1%  | 1.6 | 58 | 1%   | 1.01 | 1.01 | 1.01 | -0.23 | prolate-triaxial | "          | "          | 4784.61        | 4.785E-03         |                                        |
| 42        | 1.004              | 20.2  | -18.6 | 0.999              | 110.1 | 0.4   | 0.997              | 18.9  | 71.4  | 1%  | 0%  | 2.5 | 68 | 1%   | 1.01 | 1.00 | 1.01 | -0.43 | prolate-triaxial | 54.127862° | -6.081156° | 4957.82        | 4.958E-03         |                                        |
| 43        | 1.002              | 351.5 | -72.4 | 1.001              | 72.9  | 2.7   | 0.997              | 342.1 | 17.4  | 0%  | 0%  | 0.3 | 14 | 1%   | 1.00 | 1.00 | 1.01 | 0.60  | oblate           | 54.129672° | -6.086011° | 485            | 4.850E-04         |                                        |
| 44        | 1.442              | 139.8 | -9.7  | 1.041              | 108.4 | 78.7  | 0.517              | 48.8  | -5.8  | 40% | 52% | 0.8 | 37 | 93%  | 1.39 | 2.01 | 2.79 | 0.36  | triaxial         | 54.129971° | -6.050363° | 1728.25        | 1.728E-03         |                                        |
| 45        | 1.004              | 283.7 | -28.4 | 1.002              | 6.3   | 13.5  | 0.994              | 253.6 | 58.0  | 0%  | 1%  | 0.3 | 14 | 1%   | 1.00 | 1.01 | 1.01 | 0.60  | oblate           | 54.132047° | -6.050146° | 169.46         | 1.695E-04         |                                        |
| 46A       | 1.005              | 29.3  | -17.7 | 1.001              | 117.0 | 7.0   | 0.994              | 6.2   | 70.8  | 0%  | 1%  | 0.6 | 30 | 1%   | 1.00 | 1.01 | 1.01 | 0.28  | oblate-triaxial  | 54.109091° | -6.131863° | 527.21         | 5.272E-04         |                                        |
| 46B       | 1.006              | 21.9  | -16.0 | 0.998              | 111.3 | 2.2   | 0.997              | 13.7  | 73.8  | 1%  | 0%  | 8.0 | 83 | 1%   | 1.01 | 1.00 | 1.01 | -0.78 | prolate          | "          | "          | 431.82         | 4.318E-04         |                                        |
| 47        | 1.017              | 18.9  | -12.9 | 1.012              | 113.3 | -18.4 | 0.971              | 75.8  | 67.2  | 0%  | 4%  | 0.1 | 7  | 5%   | 1.00 | 1.04 | 1.05 | 0.79  | oblate           | 54.119290° | -6.148143° | 17200.01       | 1.720E-02         |                                        |
| 48        | 1.006              | 15.6  | -15.4 | 1.002              | 111.4 | -20.3 | 0.992              | 71.1  | 64.1  | 0%  | 1%  | 0.4 | 22 | 1%   | 1.00 | 1.01 | 1.01 | 0.43  | oblate-triaxial  | 54.128554° | -6.124220° | 5643.47        | 5.643E-03         |                                        |
| 49        | 1.011              | 27.9  | 10.3  | 1.003              | 125.7 | 36.8  | 0.985              | 284.8 | 51.3  | 1%  | 2%  | 0.4 | 24 | 3%   | 1.01 | 1.02 | 1.03 | 0.39  | oblate-triaxial  | 54.123187° | -6.124996° | 4637.38        | 4.637E-03         |                                        |
| 50        |                    |       |       |                    |       |       |                    |       |       |     |     |     |    |      |      |      |      |       |                  |            |            |                |                   |                                        |
