# Supplementary material
Source: publisher figshare collection journal article supplement (https://geolsoc.figshare.com/articles/dataset/_/3452828)

PPL

Reflected

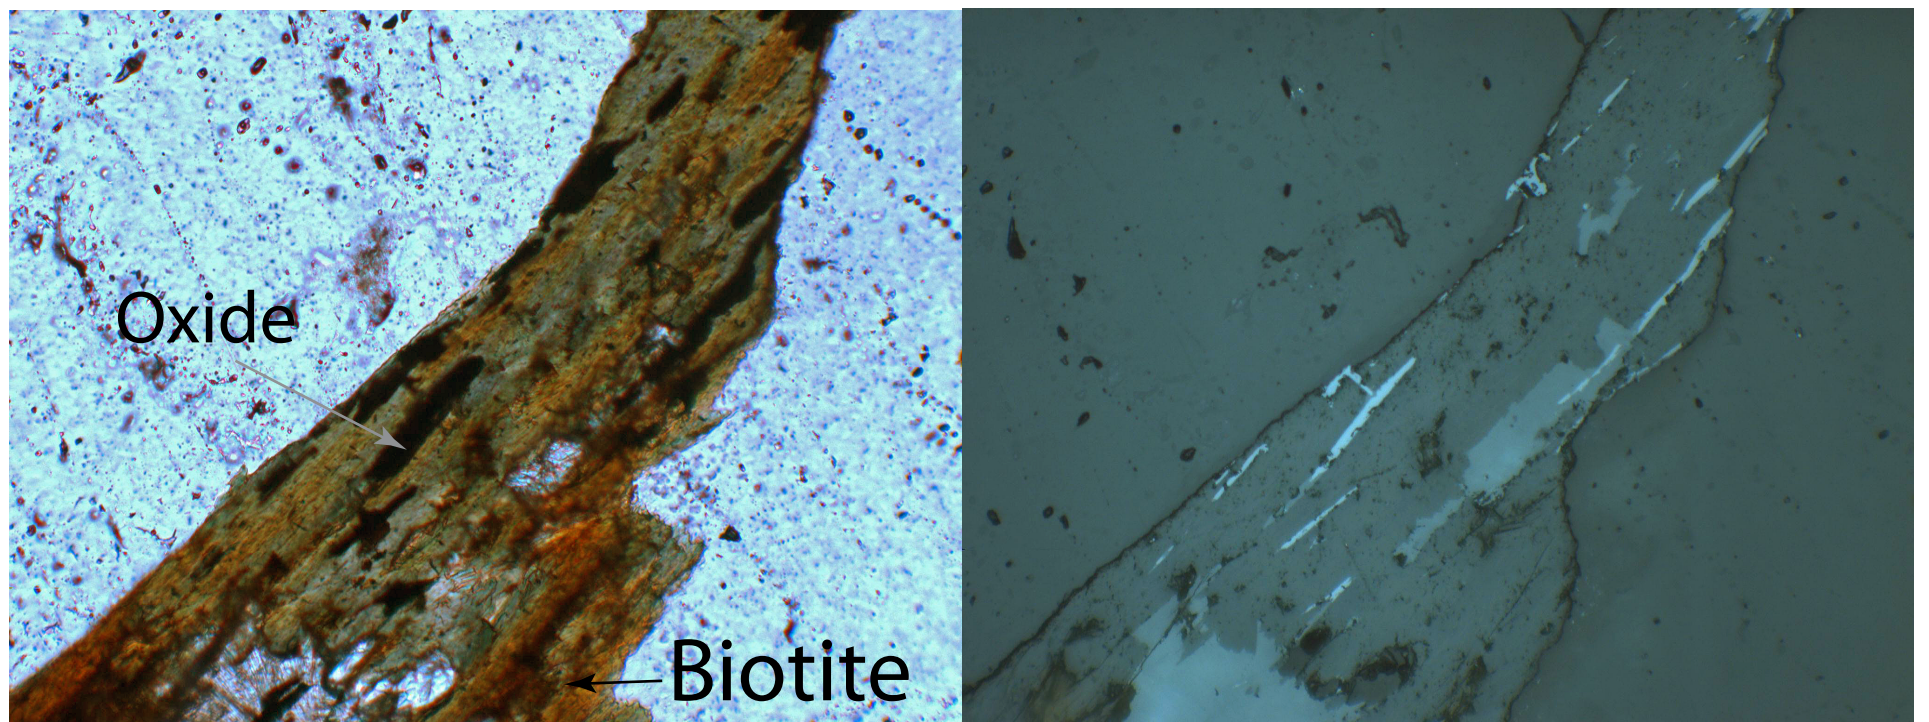

Thinsection from the Western Mourne Granite showing oxide minerals growing along biotite cleavage planes - cf. Stevenson et al. (2007b)  
Taken from sample wm33

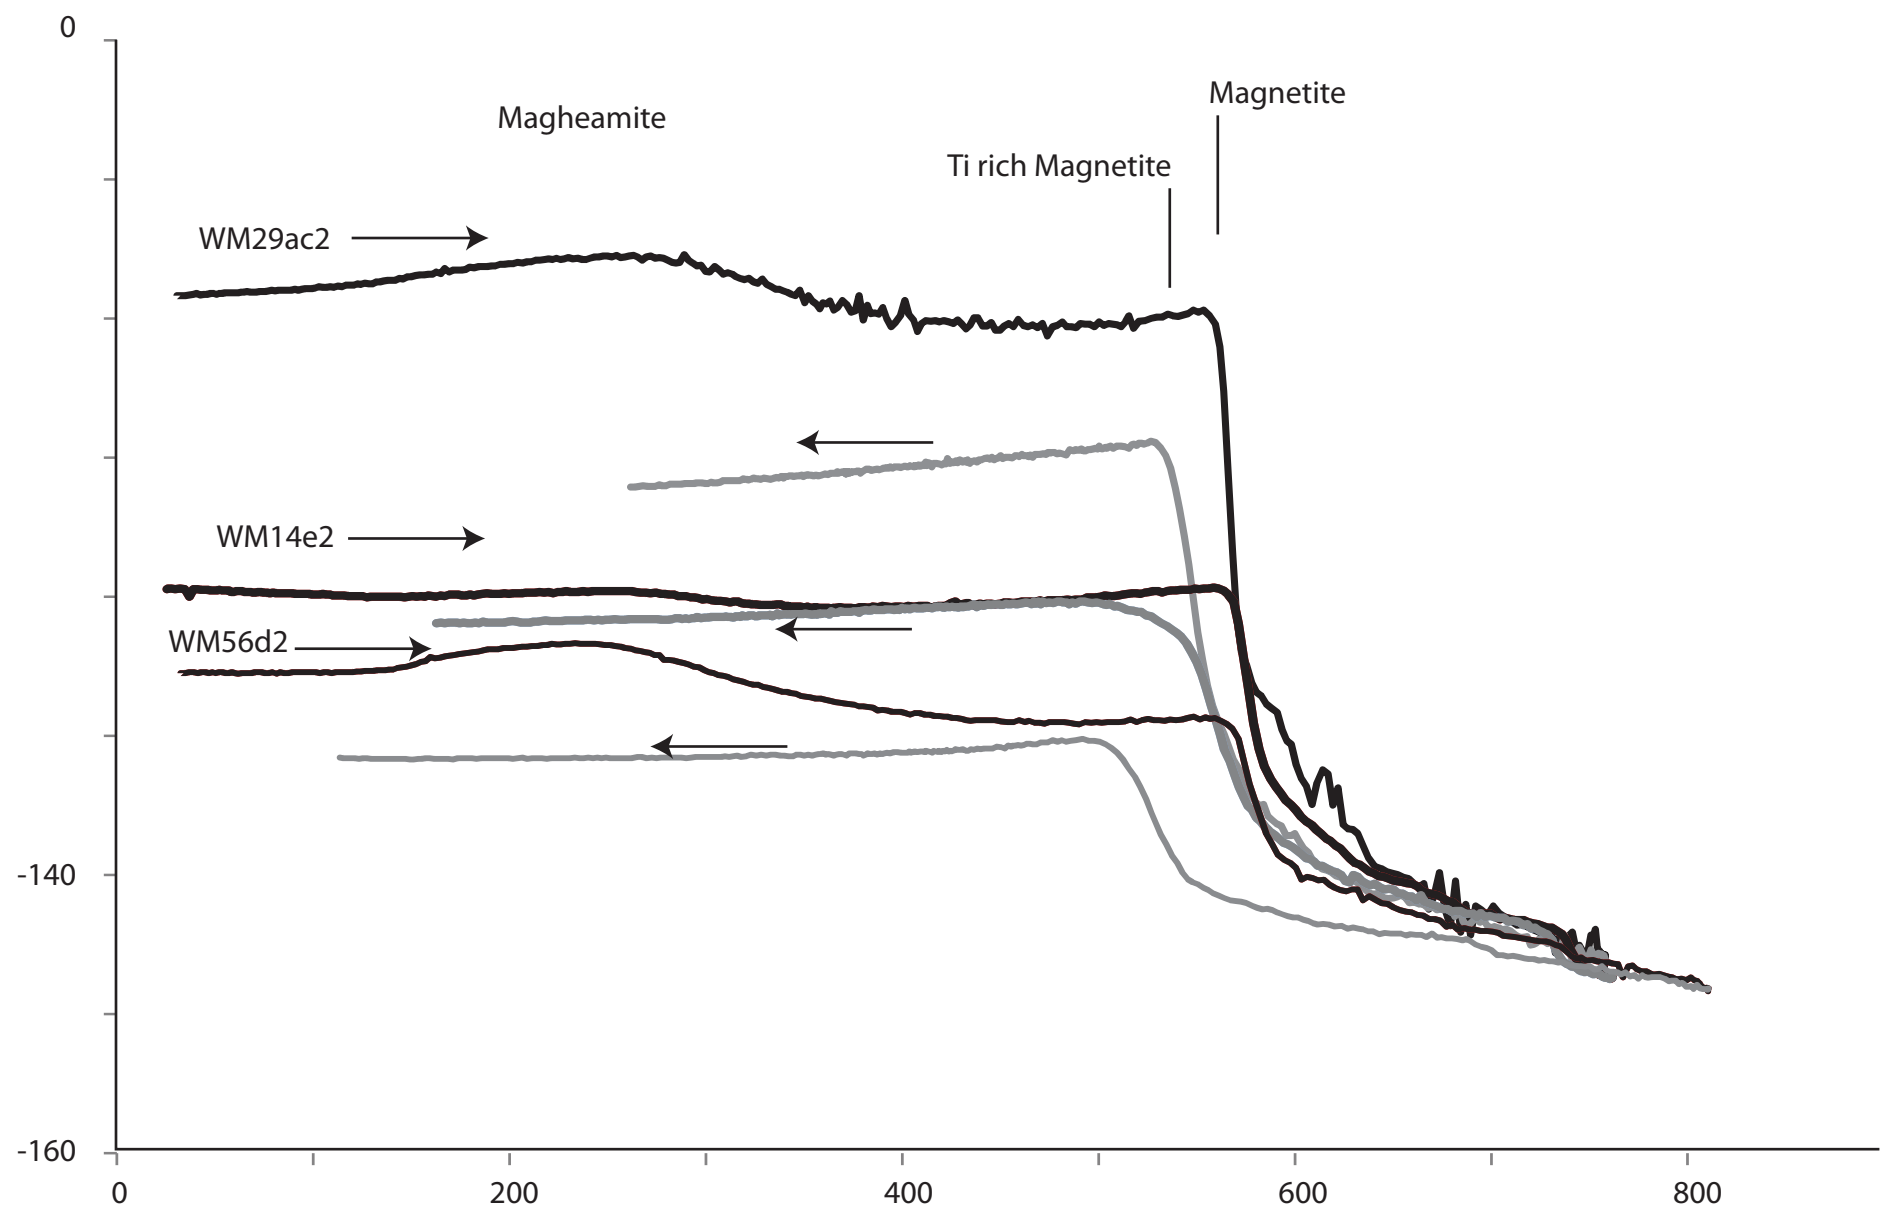

Supplement: Supplementary file 3 [file 1]
