# Supplementary material
Source: publisher figshare collection journal article supplement (https://geolsoc.figshare.com/articles/dataset/_/3452828)

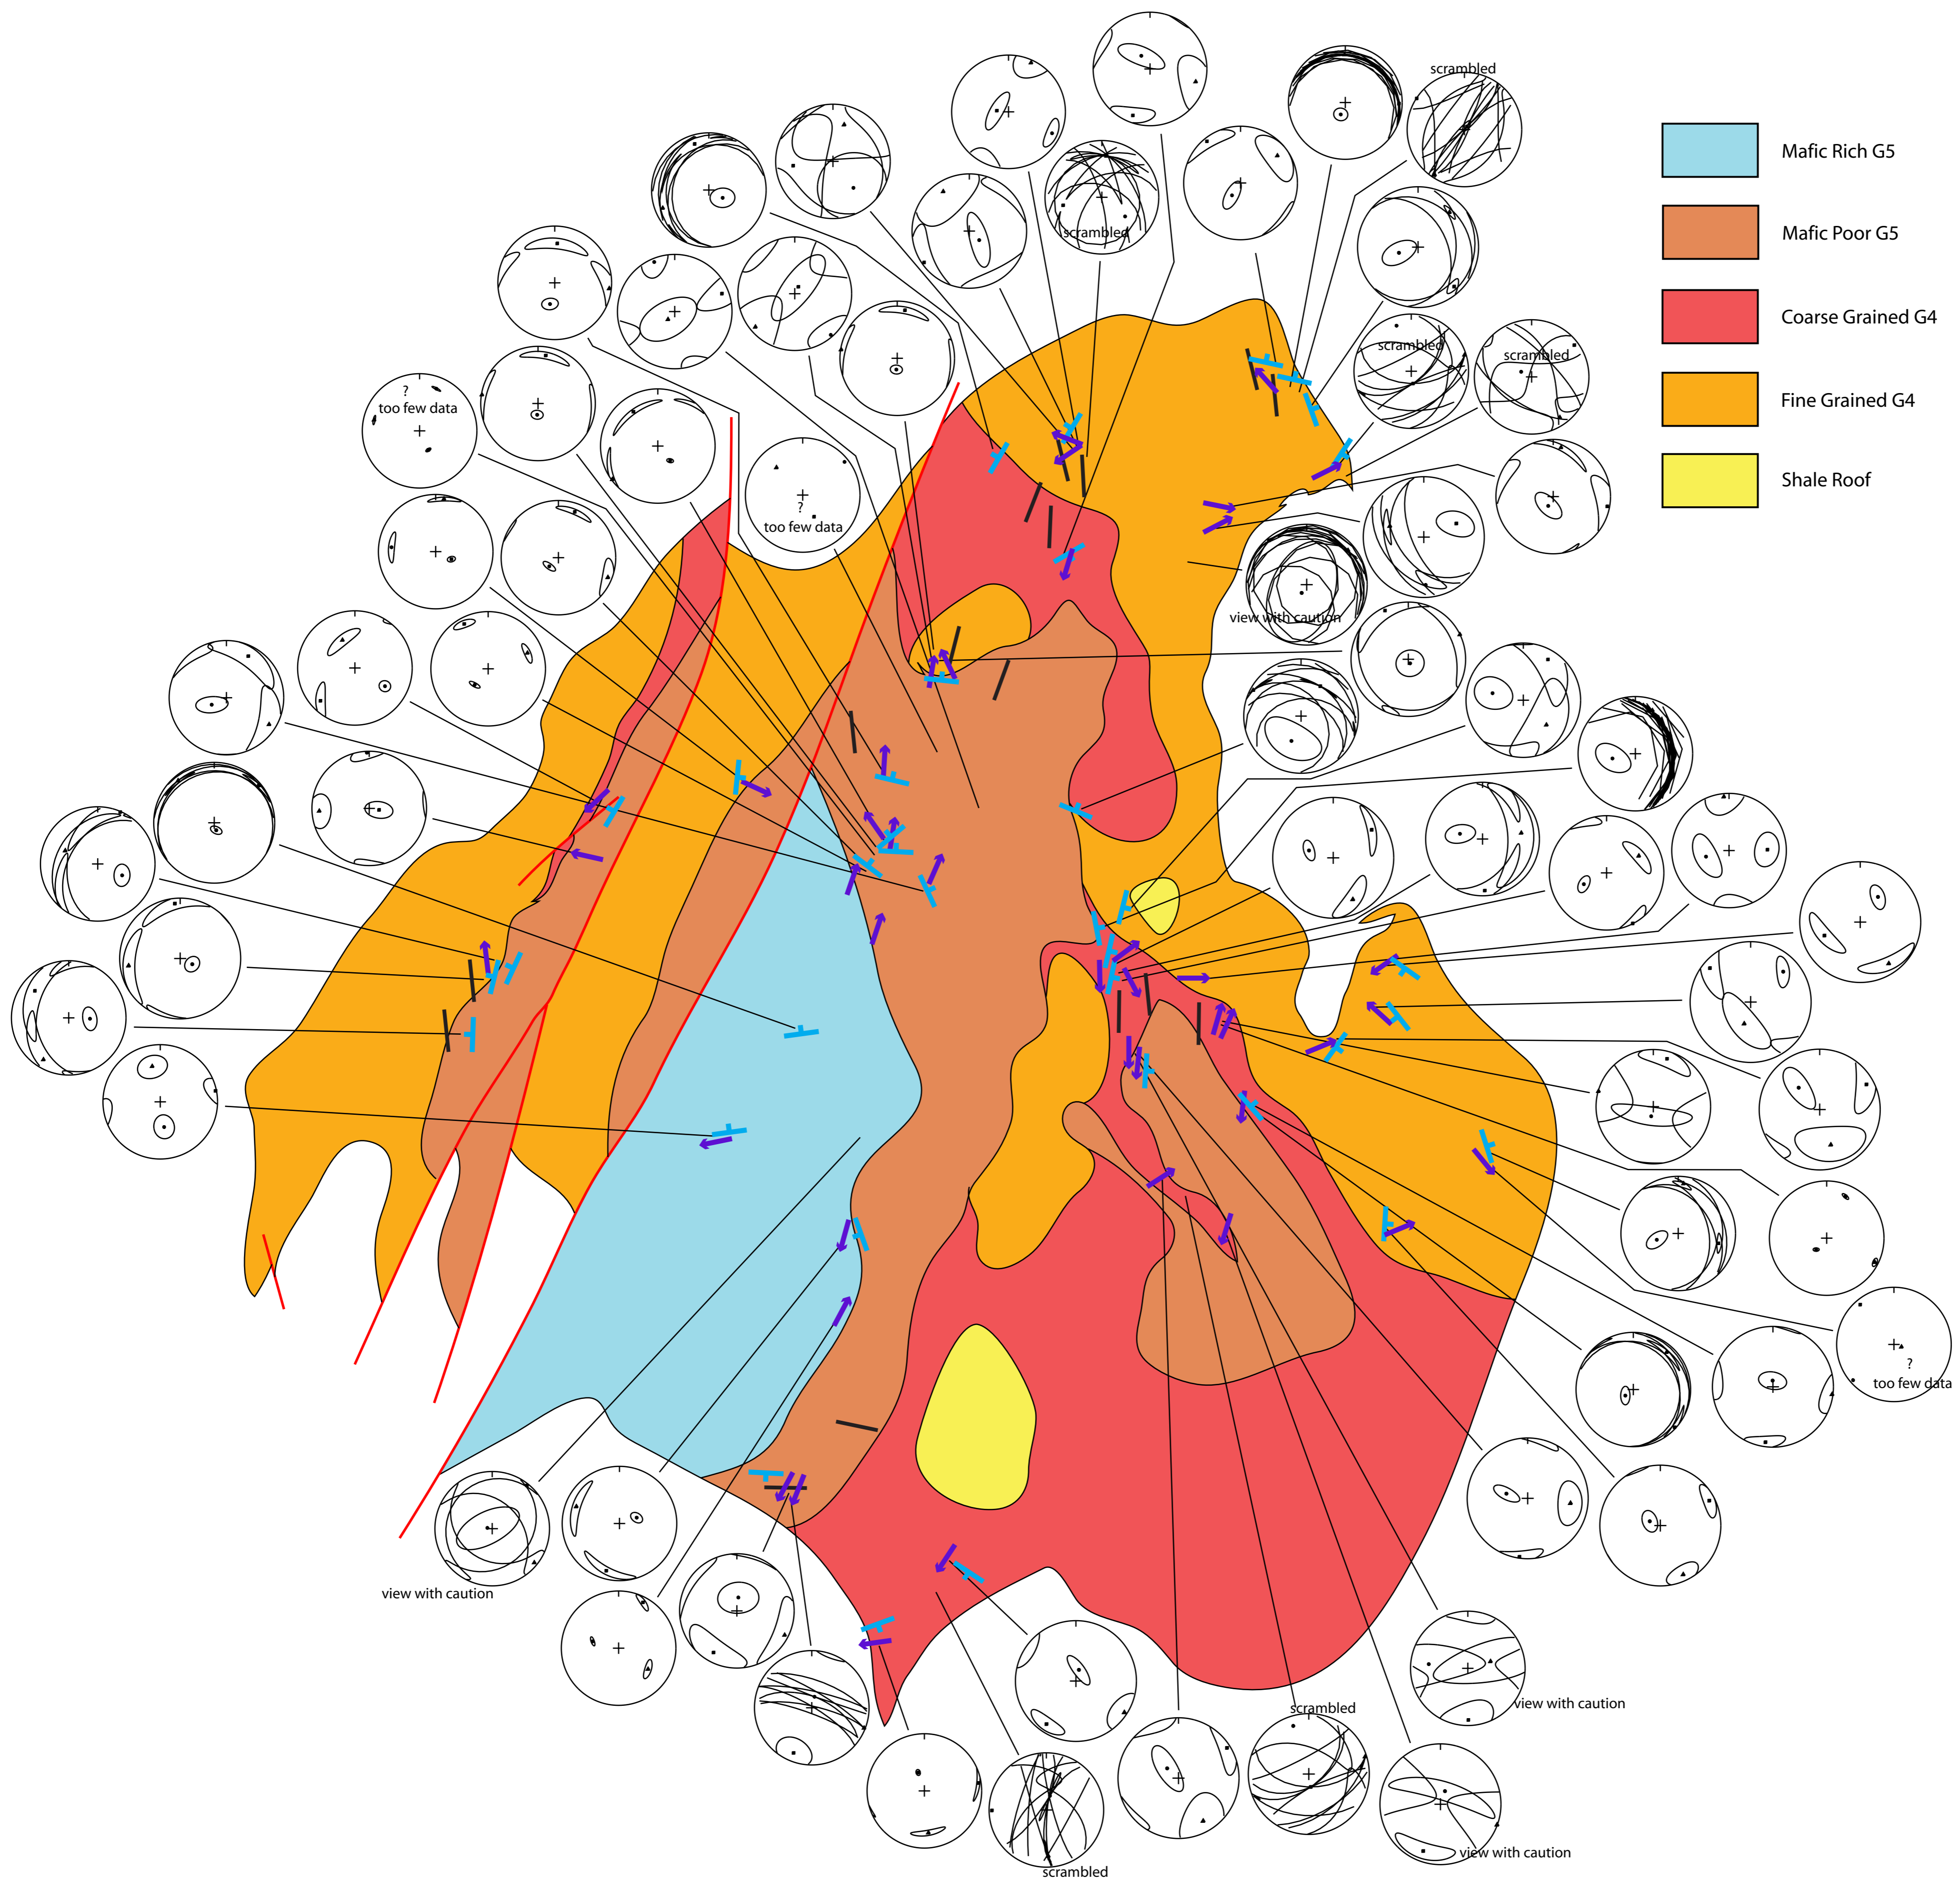

Supplement: Supplementary file 1 [file 1]
